# Supplementary material for: Methanol economy and net zero emissions: critical analysis of catalytic processes, reactors and technologies
Source: Royal Society of Chemistry journal article supplement (doi:10.1039/d1gc02078a), 2021-01-01
Supplement: d1gc02078a1.pdf [file d1gc02078a1.pdf]

**Electronic Supporting information**

**METHANOL ECONOMY AND NET ZERO EMISSIONS:  
Critical Analysis of Catalytic Processes, Reactors and  
Technologies**

Ujjal Mondal and Ganapati D. Yadav \*

<sup>+</sup>Department of Chemical Engineering,

Institute of Chemical Technology,

Nathalal Parekh Marg, Matunga,

Mumbai 400019, India.

E-mail address: [gd.yadav@ictmumbai.edu.in](mailto:gd.yadav@ictmumbai.edu.in); [gdyadav@yahoo.com](mailto:gdyadav@yahoo.com).

Tel.: +91-22-3361-2010. Fax: +91-22-3361-1020.

ORCID

Ujjal Mondal: 0000-0003-2985-2197

Ganapati D. Yadav: 0000-0002-8603-3959

**Table S1:** Kinetic models were developed by various researchers.

**Table S1**

| Rate equations                                                                                                                                                                                                                                                          | Operating conditions | authors                   | Ref. |
|-------------------------------------------------------------------------------------------------------------------------------------------------------------------------------------------------------------------------------------------------------------------------|----------------------|---------------------------|------|
| $r_{CH_3OH} = k \left( \frac{p_{CO}^{0.5} p_{H_2}}{p_{CH_3OH}^{0.66}} - \frac{P_{CH_3OH}^{0.66}}{p_{CO}^{0.5} p_{H_2} K_2^*} \right)$                                                                                                                                   | 493-533 K; 40-55 atm | Leonov et al., 1973       | 77   |
| $r_{CH_3OH} = \text{const} \frac{K_{redox}^3 (p_{CO_2}/p_{CO})^3 \left( p_{CO} p_{H_2}^2 - \frac{r_{CH_3OH}}{K_2^*} \right)}{\left[ 1 + K_{redox} p_{CO_2}/p_{CO} \right]^3 (F + K_{CO_2} p_{CO_2})^n}$ $+ k' (p_{CO_2} - (1/K_1^*) (p_{CH_3OH} p_{H_2O} / p_{H_2}^3))$ | 498-523 K, 75 atm    | Klier et al. 1982         | 65   |
| $r_{CH_3OH} = \frac{\left( f_{CO} f_{H_2}^2 - \frac{r_{CH_3OH}}{K_2^*} \right)}{(A + B f_{CO} + C f_{H_2} + G f_{CO_2})^3}$                                                                                                                                             | 488-518 K, 30-95 atm | Villa et al. 1985         | 71   |
| $r_{RWGS} = \frac{f_{CO} f_{H_2}^2 - f_{CH_3OH} / K_2^*}{M^2}$                                                                                                                                                                                                          |                      |                           |      |
| $r_{CO \rightarrow CH_3OH} = f_1 (f_{CO} f_{H_2}^{2.5})^{0.35} \left[ 1 - \left( \frac{f_{CH_3OH}}{K_{eq}} f_{CO} f_{H_2}^2 \right)^{0.8} \right]$                                                                                                                      | 488-574 K 40-95 atm  | Takagawa and Ohsugi, 1987 | 64   |
| $r_{CO \rightarrow CH_3OH} = \frac{k_1 K_{CO} \left( f_{CO} f_{H_2}^{3/2} - f_{CH_3OH} / f_{H_2}^{1/2} K_1^{eq} \right)}{(1 + K_{CO} f_{CO} + K_{CO_2} f_{CO_2}) \left( f_{H_2}^{1/2} + \left( K_{H_2O} / K_{H_2}^{1/2} \right) \right) f_{H_2O}}$                      | 483-518K 15-50 atm   | Graaf et al., 1988        | 63   |
| $r_{RWGS} = \frac{k_1 K_{CO_2} \left( f_{CO_2} f_{H_2} - f_{H_2O} f_{CO} / K_2^{eq} \right)}{(1 + K_{CO} f_{CO} + K_{CO_2} f_{CO_2}) \left( f_{H_2}^{1/2} + \left( K_{H_2O} / K_{H_2}^{1/2} \right) \right) f_{H_2O}}$                                                  |                      |                           |      |

$$r_{CO_2 \rightarrow CH_3OH} = \frac{k_3 K_{CO_2} \left( f_{k_1 K_{CO_2}} f_{H_2}^{3/2} - f_{CH_3OH} f_{H_2O} / f_{H_2}^{3/2} K_3^{eq} \right)}{\left( 1 + K_{CO} f_{CO} + K_{CO_2} f_{CO_2} \right) \left( f_{H_2}^{1/2} + \left( K_{H_2O} / K_{H_2}^{1/2} \right) \right) f_{H_2O}}$$

$$r_{CO \rightarrow CH_3OH} = \frac{A_1 A_2 A_3^{1/2} \left[ f_{CO_2} f_{H_2} - f_{CH_3OH} f_{H_2O} / (f_{H_2}^2 K_{eq, CO_2}) \right]}{\left( 1 + A_2 f_{CO_2} \right) \left[ 1 + A_3^{0.3} f_{H_2}^{1/2} + A_4 f_{H_2O} / (A_3 f_{H_2})^{0.5} \right]}$$

$$r_{RWGS} = \frac{A_5 A_2 A_3^{1/2} \left[ f_{CO_2} f_{H_2}^{1/2} - f_{CO} f_{H_2O} / (f_{H_2}^{1/2} K_{eq, WGS}) \right]}{\left( 1 + A_2 f_{CO_2} \right) \left[ 1 + A_3^{0.5} f_{H_2}^{1/2} + A_4 f_{H_2O} / (A_3 f_{H_2})^{0.5} \right]}$$

$$r_{CO/CO_2 \rightarrow CH_3OH} = \frac{\left[ p_{CO_2} p_{H_2}^2 - p_{CH_3OH} / K_{eq} \right]}{\left[ a p_{CO} p_{H_2}^{1/2} + b p_{H_2} + c p_{CO_2} \right]} + \frac{\left[ p_{CO_2} p f_{H_2} - p_{CH_3OH} p_{H_2O} / (K_{eq} f_{H_2}) \right]}{\left[ a' p_{CO_2} p_{H_2}^{1/2} + b' p_{CO_2} + c' \right]}$$

$$r_{CO_2 \rightarrow CH_3OH} = \frac{k_1 K_{H_2}^2 K_{CO_2} \left[ p_{CO_2} p_{H_2}^2 - p_{CH_3OH} p_{H_2O} / (p_{H_2} K_{eq}^{r_{CO_2 \rightarrow CH_3OH}}) \right]}{\left[ 1 + K_{H_2} p_{H_2} + K_{CO_2} p_{CO_2} + K_{CH_3OH} p_{CH_3OH} + K_{H_2O} p_{H_2O} + K_{CO} p_{CO} \right]}$$

$$r_{RWGS} = \frac{k_2 K_{H_2} K_{CO_2} \left[ p_{CO_2} p_{H_2} - p_{CO} p_{H_2O} / (K_{eq}^{r_{RWGS}}) \right]}{\left[ 1 + K_{H_2} p_{H_2} + K_{CO_2} p_{CO_2} + K_{CH_3OH} p_{CH_3OH} + K_{H_2O} p_{H_2O} + K_{CO} p_{CO} \right]}$$

$$r_{CO_2 \rightarrow CH_3OH} = \frac{k'_5 a K'_2 K_3 K_4 K_{H_2} p_{CO_2} p_{H_2} \left[ 1 - (1/K^*) \left( p_{CH_3OH} p_{H_2O} / p_{CO_2} p_{H_2}^3 \right) \right]}{\left( 1 + \left( K_{H_2O} / K_8 K_9 K_{H_2} \right) \left( p_{H_2O} / p_{H_2} \right) + \sqrt{K_{H_2} p_{H_2} + K_{H_2O} p_{H_2O}} \right)}$$

$$r_{RWGS} = \frac{k'_1 p_{CO_2} \left[ 1 - K_3^* \left( p_{CO} p_{H_2O} / p_{CO_2} p_{H_2} \right) \right]}{\left( 1 + \left( K_{H_2O} / K_8 K_9 K_{H_2} \right) \left( p_{H_2O} / p_{H_2} \right) + \sqrt{K_{H_2} p_{H_2} + K_{H_2O} p_{H_2O}} \right)}$$

$$r_+ = k_{-11} K^{-3/2} K_8^{-1} K_9 K_{10} K_{11} \left( \frac{p_{H_2}}{p_0} \right)^{3/2} \left( \frac{p_{CO_2}}{p_0} \right) \Theta^2$$

$$r_- = k_{-11} K^{-3/2} K_8^{-1} K_9 K_{10} K_{11} \frac{1}{K_G} \left( \frac{p_{H_2O} p_{CH_3OH}}{p_{H_2}^{3/2} p_0^{1/2}} \right) \Theta^2$$

$$r_{CO_2 \rightarrow CH_3OH} = r_+ - r_-$$

Dybkjaer,  
1985

McNeil et al.,  
1989

Skrzypek et al.,  
1991

Vanden Bussche and Froment,  
1996

Askgaard et al.,  
1995

$$r_{CO \rightarrow CH_3OH} = \frac{k_{CO \rightarrow CH_3OH} K_{CO} K_{H_2}^2 K_{CH,CO} \left[ p_{CO} p_{H_2}^2 - \frac{p_{CH_3OH}}{(K_{Pr_{CO \rightarrow CH_3OH}})} \right]}{(1 + K_{CO} p_{CO}) (1 + K_{H_2}^{0.5} p_{H_2}^{0.5} + K_{H_2O} p_{H_2O})} \quad \begin{matrix} 523-553 \\ K \\ 40 \text{ bar} \end{matrix}$$

Lim et al.,  
2009 <sup>82</sup>

$$r_{CO_2 \rightarrow CH_3OH} = \frac{k_{CO_2 \rightarrow CH_3OH} K_{H_2} K_{CO_2} K_{CH,CO_2} \left[ p_{CO_2} p_{H_2}^3 - \frac{p_{CH_3OH} p_{H_2O}}{(K_{Pr_{CO_2 \rightarrow CH_3OH}})} \right]}{(1 + K_{CO_2} p_{CO_2}) (1 + K_{H_2}^{0.5} p_{H_2}^{0.5} + K_{H_2O} p_{H_2O}) p_{H_2}^2}$$

$$r_{RWGS} = \frac{k_{RWGS} K_{CO_2} K_{H_2}^{0.5} \left[ p_{CO_2} p_{H_2} - \frac{p_{CO} p_{H_2O}}{(K_{Pr_{RWGS}})} \right]}{(1 + K_{CO_2} p_{CO_2}) (1 + K_{H_2}^{0.5} p_{H_2}^{0.5} + K_{H_2O} p_{H_2O}) p_{H_2}^{0.5}}$$

$$r_{CO_2} = \frac{k_1 K_2 f_{CO_2} f_{H_2}^{1.5} EQ_1}{(1 + K_1 f_{CO} + K_2 f_{CO_2}) (f_{H_2}^{0.5} + K_3 f_{H_2O})}$$

$$r_{RWGS} = \frac{k_2 K_2 f_{CO_2} f_{H_2} EQ_2}{(1 + K_1 f_{CO} + K_2 f_{CO_2}) (f_{H_2}^{0.5} + K_3 f_{H_2O})}$$

Henkel  
2011 <sup>62</sup>

$$EQ_1 = 1 - \frac{f_{MEOH} f_{H_2O}}{f_{CO_2} f_{H_2}^3 K_{EQ_1}}$$

$$EQ_2 = 1 - \frac{f_{CO} f_{H_2O}}{f_{CO_2} f_{H_2} K_{EQ_2}}$$

$$r_{CO \rightarrow CH_3OH} = \frac{k'_{r_{CO \rightarrow CH_3OH}} K_{CO} \left[ f_{CO} f_{H_2}^{0.5} - \frac{f_{CH_3OH}}{(f_{H_2}^{0.5} K_{eq_{CO \rightarrow CH_3OH}})} \right]}{(1 + K_{CO} f_{CO}) (1 + K_{H_2}^{0.5} f_{H_2}^{0.5} + K_{H_2O} f_{H_2O})}$$

Park et  
al., 2014 <sup>85</sup>

$$r_{CO_2 \rightarrow CH_3OH} = \frac{k'_{r_{CO_2 \rightarrow CH_3OH}} K_{CO_2} \left[ f_{CO_2} f_{H_2}^{1.5} - \frac{f_{H_2O} f_{CH_3OH}}{(f_{H_2}^{1.5} K_{eq_{CO_2 \rightarrow CH_3OH}})} \right]}{(1 + K_{CO_2} f_{CO_2}) (1 + K_{H_2}^{0.5} f_{H_2}^{0.5} + K_{H_2O} f_{H_2O})}$$

$$r_{RWGS} = \frac{k'_{r_{RWGS}} K_{CO_2} \left[ f_{CO_2} f_{H_2} - \frac{f_{CO} f_{H_2O}}{K_{Pr_{RWGS}}} \right]}{(1 + K_{CO_2} f_{CO_2}) (1 + K_{H_2}^{0.5} f_{H_2}^{0.5} + K_{H_2O} f_{H_2O})}$$

$$r_{CO} = k_1 b_{CO} \left( \frac{P_{CO} P_{H_2}^{3/2} - \frac{P_{CH_3OH}}{K_1 P_{H_2}^{0.5}}}{(1 + b_{CO} P_{CO} + b_{CO_2} P_{CO_2}) \left[ P_{H_2}^{1/2} + \frac{b_{H_2O}}{b_{H_2}^{1/2}} P_{H_2O} \right]} \right)$$

473-503K Portha et al, 2017 <sup>83</sup>  
50-80 atm

$$r_{CO_2} = k_2 b_{CO_2} \left( \frac{P_{CO} P_{H_2O}}{P_{CO_2} P_{H_2} - \frac{P_{CO} P_{H_2O}}{K_2}}}{(1 + b_{CO} P_{CO} + b_{CO_2} P_{CO_2}) \left[ P_{H_2}^{1/2} + \frac{b_{H_2O}}{b_{H_2}^{1/2}} P_{H_2O} \right]} \right)$$

$$r_{RWGS} = k_3 b_{CO_2} \left( \frac{P_{CH_3OH} P_{H_2O}}{P_{CO_2} P_{H_2}^{3/2} - \frac{P_{CH_3OH} P_{H_2O}}{K_3 P_{H_2}^{3/2}}}}{(1 + b_{CO} P_{CO} + b_{CO_2} P_{CO_2}) \left[ P_{H_2}^{1/2} + \frac{b_{H_2O}}{b_{H_2}^{1/2}} P_{H_2O} \right]} \right)$$

$$r_{CO} = k_1 p_{CO} p_{H_2}^2 \left( 1 - \frac{1}{K_{P1}} \frac{p_{CH_3OH}}{p_{CO} p_{H_2}^2} \right) \theta^{\ominus} \theta^{\otimes 4}$$

503.15-522.15 K Seidel et al., 2018 <sup>60</sup>  
30-60 bar

$$r_{CO_2} = k_2 p_{CO_2} p_{H_2}^2 \left( 1 - \frac{1}{K_{P2}} \frac{p_{CH_3OH} p_{H_2O}}{p_{CO_2} p_{H_2}^3} \right) \theta^{\ominus 2} \theta^{\otimes 4}$$

$$r_{RWGS} = k_3 p_{CO_2} \left( 1 - \frac{1}{K_{P3}} \frac{p_{CO} p_{H_2O}}{p_{CO_2} p_{H_2O}} \right) \theta^{\ominus} \theta^*$$

$$\theta^{\ominus} = 1 + K_{CO} p_{CO} + K_{CH_3OH} p_{CH_3OH} + K_{CO_2} p_{CO_2}$$

$$\theta^{\otimes} = \sqrt{K_{H_2}} \sqrt{p_{H_2}}$$

$$\theta^* = 1 + \frac{K_O K_{H_2O} p_{H_2O}}{K_{H_2} p_{H_2}} + K_{CO_2} p_{CO_2} + K_{CH_3OH}^* p_{CH_3OH} + K_{H_2O} p_{H_2O}$$

$$r_{CO_2} = k_1 K_2 \left( \frac{f_{CO_2} f_{H_2}^{1.5} - \frac{f_{CH_3OH} f_{H_2O}}{K_{eq1} f_{H_2}^{3/2}}}{(1 + K_1 f_{CO} + K_2 f_{CO_2}) [f_{H_2}^{1/2} + K_3 f_{H_2O}]} \right)$$

423-623 K Nestler et al. 2020 <sup>88</sup>  
50-80 atm  
GHSV  
10000<sup>-1</sup>

$$r_{rWGS} = k_2 K_2 \left( \frac{f_{CO_2} f_{H_2} - \frac{f_{CO} f_{H_2O}}{K_{eq2}}}{(1 + K_1 f_{CO} + K_2 f_{CO_2}) [f_{H_2}^{1/2} + K_3 f_{H_2O}]} \right)$$

$$r_{CO} = k_3 K_1 \left( \frac{f_{CO_2} f_{H_2}^{1.5} - \frac{f_{CH_3OH} f_{H_2O}}{K_{eq1} f_{H_2}^{3/2}}}{(1 + K_1 f_{CO} + K_2 f_{CO_2}) [f_{H_2}^{1/2} + K_3 f_{H_2O}]} \right)$$

$$r_{CO_2} = k_{CO_2} f_{CO_2} f_{H_2}^2 \left( 1 - \frac{1}{K_{pCO_2}^o(T)} \frac{f_{CH_3OH} f_{H_2O}}{f_{H_2}^3 f_{CO_2}} \right) \Theta^{*2}$$

$$r_{RWGS} = k_{RWGS} f_{CO_2} f_{H_2}^{0.5} \left( 1 - \frac{1}{K_{RWGS}^o(T)} \frac{f_{CO} f_{H_2O}}{f_{CO_2} f_{H_2}} \right) \Theta^*$$

$$\Theta^* = (f_{H_2}^{0.5} k_{H_2} + f_{H_2O} k_{H_2O/9} + f_{H_2O})$$

450-600      Slotboom <sup>76</sup>  
 K              et al.,  
 20-100        2020  
 atm
